# Supplementary material for: Plasma miRNA Profiles in Pregnant Women Predict Infant Outcomes following Prenatal Alcohol Exposure
Source: PubMed Central journal article supplement (PMC5102408; doi:10.1371/journal.pone.0165081), 2016-11-09
Supplement: pone.0165081.s002.pdf [file pone.0165081.s002.pdf]

## S2 File: Supplementary Data:

Sample Q/C analysis. Erythrocyte lysis is an important source of miRNA contamination in plasma samples [1, 2]. Therefore, as published previously [3], we assessed the quality of the plasma samples and derived RNA in four ways. Firstly, we assessed plasma samples for free hemoglobin content as well as bound oxy- and de-oxy hemoglobin by spectrometric analysis. We found no evidence for whole erythrocyte contamination (i.e., no detectable oxy and deoxyhemoglobin **S1 Fig., a**) in plasma samples, and minimal hemolysis (spectral absorbance at 414nm), equal to or less than previously published [3]. There was no significant effect of recruitment site ( $P=0.88$ ) or exposure group ( $P=0.76$ ) on hemolysis. Interestingly, there was a small but statistically significant decline in free hemoglobin at the end of pregnancy compared to the mid-pregnancy period (ANOVA,  $F_{(1,125)}=6.67$ ,  $P<0.01$ , **S1 Fig., b**), indicative perhaps of pregnancy-associated anemia in this cohort. Secondly, none of the assessed plasma samples amplified the mRNA transcript for Band-3 protein (SLC4A1, **S1 Fig., c**) which is abundant in erythrocytes. Thirdly, the mean sample  $\Delta Cq$  for  $_{\text{plasma\_stable}}\text{miR23a-erythrocyte\_abundant}\text{miR451a}$ ,  $-0.88 \pm 0.677$  (Mean  $\pm$  SEM), was below the identified threshold for hemolysis ( $\Delta Cq>7$ , [4], and was not significantly altered due to recruitment site ( $P=0.94$ ), pregnancy stage ( $P=0.71$ ) or exposure group ( $P=0.65$ ) indicating that there was not a systematic variable-dependent effect on hemolysis. These data collectively eliminate hemolysis as a significant contributor to sample miRNA content.

## References:

1. Kirschner MB, Kao SC, Edelman JJ, Armstrong NJ, Vallety MP, van Zandwijk N, et al. Haemolysis during sample preparation alters microRNA content of plasma. *PLoS One*. 2011;6(9):e24145. Epub 2011/09/13. doi: 10.1371/journal.pone.0024145. PubMed PMID: 21909417; PubMed Central PMCID: PMC3164711.
2. Pritchard CC, Kroh E, Wood B, Arroyo JD, Dougherty KJ, Miyaji MM, et al. Blood cell origin of circulating microRNAs: a cautionary note for cancer biomarker studies. *Cancer Prev Res (Phila)*. 2012;5(3):492-7. Epub 2011/12/14. doi: 10.1158/1940-6207.CAPR-11-0370. PubMed PMID: 22158052.
3. Balaraman S, Lunde ER, Sawant O, Cudd TA, Washburn SE, Miranda RC. Maternal and neonatal plasma microRNA biomarkers for fetal alcohol exposure in an ovine model. *Alcohol Clin Exp Res*. 2014;38(5):1390-400. Epub 2014/03/05. doi: 10.1111/acer.12378. PubMed PMID: 24588274; PubMed Central PMCID: PMC3999266.
4. Blondal T, Jensby Nielsen S, Baker A, Andreasen D, Mouritzen P, Wrang Teilum M, et al. Assessing sample and miRNA profile quality in serum and plasma or other biofluids. *Methods*. 2013;59(1):S1-6. Epub 2012/10/06. doi: 10.1016/j.ymeth.2012.09.015. PubMed PMID: 23036329.
