# Supplementary material for: Plasma miRNA Profiles in Pregnant Women Predict Infant Outcomes following Prenatal Alcohol Exposure
Source: PubMed Central journal article supplement (PMC5102408; doi:10.1371/journal.pone.0165081), 2016-11-09
Supplement: pone.0165081.s004.pdf [file pone.0165081.s004.pdf]

| Pregnancy Stage | p-value (B&H Corrected) |             | Mean $\Delta$ CT |           |          |           |          |           | SEM $\Delta$ CT |           |          |           |          |           | miRNA           | MIMAT#       |
|-----------------|-------------------------|-------------|------------------|-----------|----------|-----------|----------|-----------|-----------------|-----------|----------|-----------|----------|-----------|-----------------|--------------|
|                 | Exposure Group          | Interaction | UE               |           | HEua     |           | HEa      |           | UE              |           | HEua     |           | HEa      |           |                 |              |
|                 |                         |             | Mid preg         | Late preg | Mid preg | Late preg | Mid preg | Late preg | Mid preg        | Late preg | Mid preg | Late preg | Mid preg | Late preg |                 |              |
| 0.958           | 0.006                   | 0.981       | 16.87            | 16.77     | 16.37    | 16.89     | 13.92    | 13.97     | 0.32            | 0.25      | 0.61     | 0.29      | 1.10     | 0.99      | hsa-miR-222-5p  | MIMAT0004569 |
| 0.958           | 0.006                   | 0.871       | 16.21            | 15.16     | 15.87    | 15.62     | 10.28    | 11.89     | 0.65            | 1.02      | 0.91     | 0.93      | 1.54     | 1.43      | hsa-miR-187-5p  | MIMAT0004561 |
| 0.658           | 0.038                   | 0.926       | 15.70            | 16.77     | 14.88    | 15.88     | 11.39    | 13.99     | 0.82            | 0.25      | 1.02     | 0.72      | 1.52     | 1.05      | hsa-miR-299-3p  | MIMAT0000687 |
| 0.686           | 0.038                   | 0.947       | 16.07            | 16.77     | 16.17    | 16.89     | 12.45    | 14.26     | 0.78            | 0.25      | 0.70     | 0.29      | 1.46     | 1.19      | hsa-miR-491-3p  | MIMAT0004765 |
| 0.815           | 0.038                   | 0.987       | 13.54            | 15.17     | 13.06    | 13.72     | 9.00     | 9.46      | 1.26            | 0.99      | 1.32     | 1.13      | 1.85     | 1.80      | hsa-miR-885-3p  | MIMAT0004948 |
| 0.658           | 0.038                   | 0.851       | 12.71            | 12.65     | 15.59    | 10.57     | 9.86     | 6.90      | 1.33            | 1.36      | 0.82     | 1.49      | 1.45     | 1.33      | hsa-miR-518f-3p | MIMAT0002842 |
| 0.866           | 0.038                   | 0.871       | 14.31            | 12.90     | 13.75    | 15.34     | 8.33     | 10.16     | 1.23            | 1.65      | 1.34     | 1.13      | 1.77     | 1.69      | hsa-miR-760     | MIMAT0004957 |
| 0.846           | 0.038                   | 0.926       | 14.57            | 15.42     | 13.94    | 13.45     | 8.52     | 10.67     | 1.23            | 0.99      | 1.38     | 1.50      | 1.76     | 1.65      | hsa-miR-671-5p  | MIMAT0003880 |
| 0.860           | 0.038                   | 0.851       | 16.87            | 16.07     | 15.56    | 15.33     | 11.00    | 13.57     | 0.32            | 0.72      | 0.95     | 1.01      | 1.64     | 1.30      | hsa-miR-449a    | MIMAT0001541 |
| 0.966           | 0.038                   | 0.961       | 15.31            | 14.39     | 14.45    | 14.17     | 9.34     | 10.25     | 1.03            | 1.32      | 1.31     | 1.35      | 1.83     | 1.74      | hsa-miR-204-5p  | MIMAT0000265 |
| 0.860           | 0.038                   | 0.851       | 16.20            | 14.66     | 13.79    | 15.48     | 11.74    | 9.62      | 0.74            | 1.09      | 1.39     | 1.03      | 1.64     | 1.68      | hsa-miR-519a-3p | MIMAT0002869 |
| 0.958           | 0.065                   | 0.851       | 11.37            | 12.66     | 11.67    | 13.18     | 8.25     | 4.56      | 1.84            | 1.70      | 1.87     | 1.61      | 2.11     | 2.04      | hsa-miR-363-3p  | MIMAT0000707 |
| 0.864           | 0.065                   | 0.960       | 11.77            | 12.96     | 6.72     | 7.98      | 11.28    | 10.85     | 1.46            | 1.31      | 1.47     | 1.56      | 1.42     | 1.52      | hsa-miR-378a-5p | MIMAT0000731 |
| 0.658           | 0.074                   | 0.851       | 10.48            | 15.91     | 13.65    | 14.37     | 8.56     | 9.21      | 1.80            | 0.81      | 1.43     | 1.39      | 1.95     | 1.81      | hsa-miR-539-5p  | MIMAT0003163 |
| 0.658           | 0.074                   | 0.851       | 15.10            | 16.77     | 16.14    | 13.63     | 14.14    | 10.25     | 1.10            | 0.25      | 0.73     | 1.34      | 1.19     | 1.52      | hsa-miR-518b    | MIMAT0002844 |
| 0.846           | 0.074                   | 0.928       | 11.01            | 10.82     | 11.64    | 11.57     | 7.07     | 4.07      | 1.79            | 1.94      | 1.78     | 1.83      | 2.00     | 1.92      | hsa-miR-133b    | MIMAT0000770 |
| 0.958           | 0.074                   | 0.851       | 8.98             | 6.27      | 5.29     | 9.35      | 3.42     | 2.54      | 1.72            | 1.63      | 1.43     | 1.66      | 1.14     | 1.20      | hsa-miR-10b-5p  | MIMAT0000254 |
| 0.812           | 0.076                   | 0.992       | 8.03             | 6.53      | 8.25     | 7.35      | 4.26     | 2.88      | 1.48            | 1.47      | 1.45     | 1.42      | 1.19     | 0.84      | hsa-miR-517c-3p | MIMAT0002866 |
| 0.686           | 0.076                   | 0.908       | 13.54            | 10.68     | 13.53    | 13.32     | 9.97     | 8.55      | 1.11            | 1.44      | 1.13     | 1.20      | 1.21     | 1.31      | hsa-miR-518e-5p | MIMAT0005450 |
| 0.658           | 0.088                   | 0.871       | 16.24            | 14.07     | 15.66    | 14.78     | 13.59    | 9.89      | 0.71            | 1.23      | 0.97     | 1.16      | 1.27     | 1.58      | hsa-miR-524-3p  | MIMAT0002850 |
| 0.955           | 0.097                   | 0.948       | 16.87            | 16.75     | 16.99    | 16.89     | 14.76    | 15.43     | 0.32            | 0.26      | 0.29     | 0.29      | 1.24     | 0.73      | hsa-miR-147b    | MIMAT0004928 |

S2 Fig.

S2 Fig. Table showing mean  $\pm$  SEM of  $\Delta$ CT for miRNAs that exceeded the Benjamini & Hochberg (B&H) criterion of  $P < 0.05$  (blue) or  $P < 0.1$  (black) for the main effect of exposure group.
