# Supplementary material for: Plasma miRNA Profiles in Pregnant Women Predict Infant Outcomes following Prenatal Alcohol Exposure
Source: PubMed Central journal article supplement (PMC5102408; doi:10.1371/journal.pone.0165081), 2016-11-09
Supplement: pone.0165081.s006.pdf [file pone.0165081.s006.pdf]

**Model 1: miRNAs at mid- and late-pregnancy included as separate variables**

| Variable        | Mean Decrease In Accuracy |
|-----------------|---------------------------|
| smokstat        | 31.2349793                |
| sescat          | 12.3908923                |
| Lp MIMAT0002874 | 7.44256525                |
| Mp MIMAT0002874 | 6.24438558                |
| Lp MIMAT0001340 | 5.5610741                 |
| parity          | 4.60053692                |
| Mp MIMAT0000754 | 3.83730437                |
| Mp MIMAT0001340 | 2.89012008                |
| Mp MIMAT0004694 | 2.81044641                |
| Mp MIMAT0004586 | 2.15263239                |
| CSEX            | 2.09063045                |
| Mp MIMAT0000099 | 1.44548284                |
| Lp MIMAT0000267 | 1.35518917                |
| Mp MIMAT0000070 | 1.19303071                |
| Mp MIMAT0000082 | 1.14938756                |
| momage          | 0.89594593                |
| Lp MIMAT0004949 | 0.88702357                |
| Lp MIMAT0000082 | 0.76648162                |
| Mp MIMAT0000756 | 0.69939031                |
| Lp MIMAT0000760 | 0.66213887                |
| Mp MIMAT0000065 | 0.63706996                |
| Lp MIMAT0000446 | 0.16832586                |
| Lp MIMAT0000099 | 0.05203789                |
| MIMAT0003239    | 0.0072464                 |

**Model2: Difference in miRNA expression between mid- and late-pregnancy ( $\Delta\Delta CT$ )**

| Variable          | Mean Decrease In Accuracy |
|-------------------|---------------------------|
| smokstat          | 31.06393602               |
| sescat            | 8.436505885               |
| Diff-MIMAT0006764 | 4.405359434               |
| parity            | 3.284078795               |
| Diff-MIMAT0002820 | 2.965049075               |
| Diff-MIMAT0000080 | 2.759856444               |
| Diff-MIMAT0004586 | 2.499760109               |
| Diff-MIMAT0001340 | 2.262839468               |
| CSEX              | 2.260439439               |
| Diff-MIMAT0000244 | 2.177098016               |
| Diff-MIMAT0000452 | 1.545810412               |
| Diff-MIMAT0000703 | 1.402999971               |
| Diff-MIMAT0004775 | 1.13741312                |
| momage            | 0.691944058               |
| Diff-MIMAT0000762 | 0.12592057                |
| Diff-MIMAT0004949 | 0.110602036               |
| Diff-MIMAT0004509 | 0.062465412               |

S4 Fig.

**S4 Fig.** Significant variables for Random Forest Classification models. Lp, late pregnancy; Mp, Mid-pregnancy; Diff-, difference in  $\Delta CT$  (change in miRNA expression) between mid and late pregnancy; smokstat, smoking status; sescat, socioeconomic status; CSEX, infant's sex; momage, maternal age at enrollment
