# Supplementary material for: Plasma miRNA Profiles in Pregnant Women Predict Infant Outcomes following Prenatal Alcohol Exposure
Source: PubMed Central journal article supplement (PMC5102408; doi:10.1371/journal.pone.0165081), 2016-11-09
Supplement: pone.0165081.s007.pdf [file pone.0165081.s007.pdf]

Models 1 & 2, including Total RNA in the Random Forest Classification Models

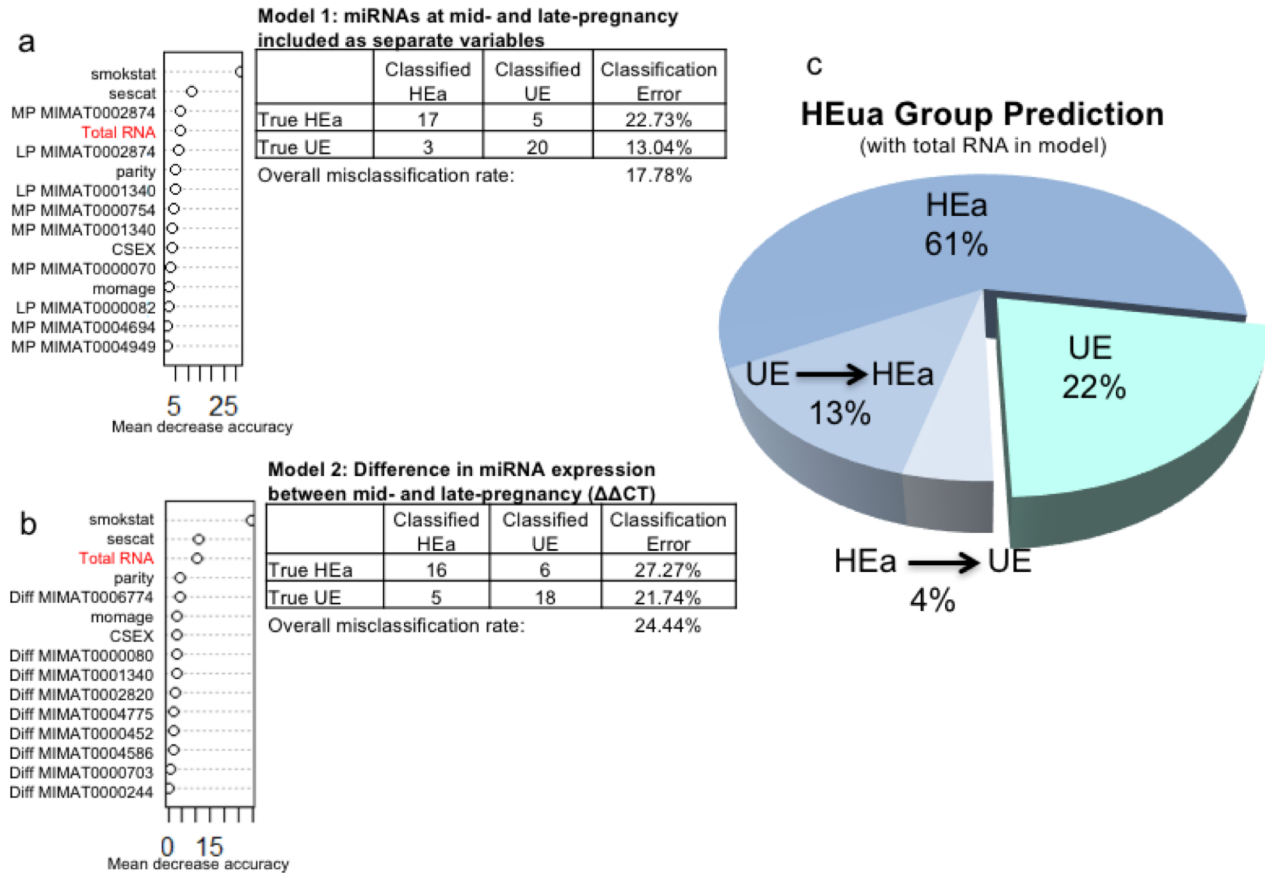

S5 Fig.

S5 Fig. Prediction model with the variable 'total recovered RNA' (total RNA) included. (a) Model 1 which includes miRNAs (classified by MIMAT#####) from mid-(MP) and late-(LP) pregnancy as separate variables. Overall misclassification rate was 17.78%. (b) Model 2 includes the difference in miRNA expression between mid- and late-pregnancy. Overall misclassification rate was 24.44%. (c) Using classification model #1 to classify the HEua group, results in a majority of the HEua group predicted to be HEa-like throughout pregnancy.
